# Supplementary material
Source: PubMed Central journal article supplement (PMC6078823)

Supplemental Fig 1: Establishment of CoWas colony

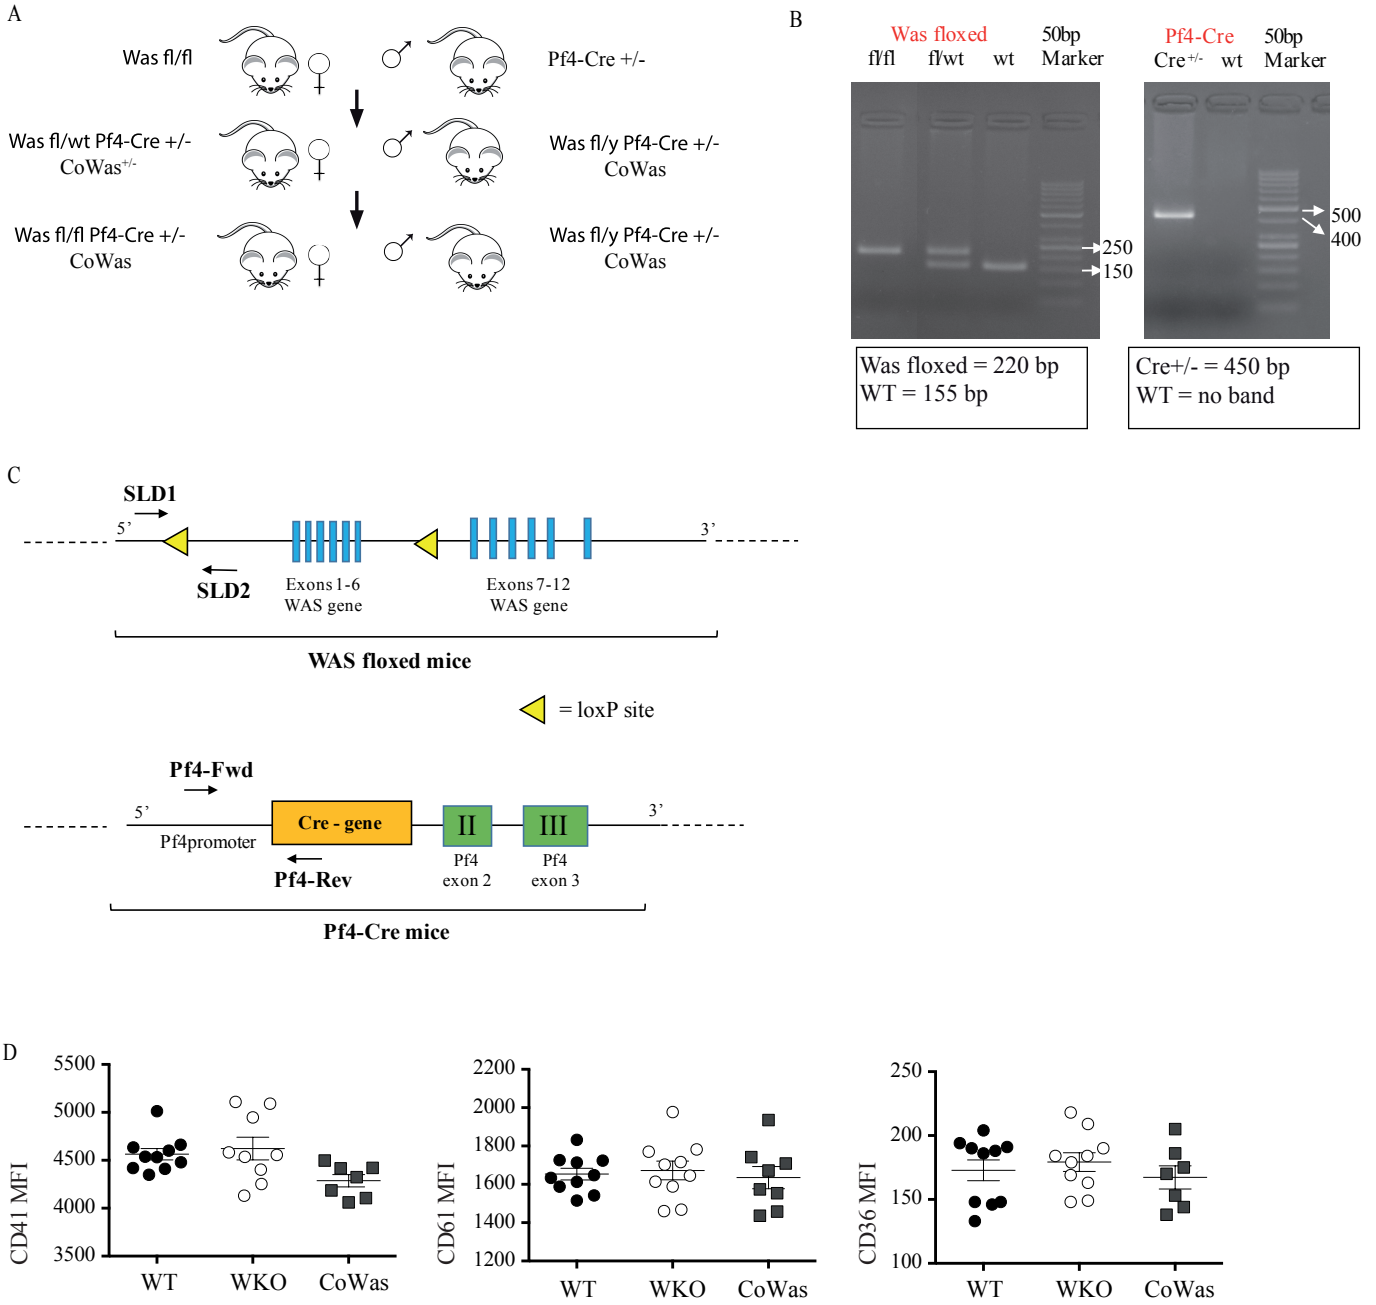

Supplement: NIHMS982539-supplement-Fig_E1.pdf [file NIHMS982539-supplement-Fig_E1.pdf]

Supplemental Fig 2: Was<sup>-/-</sup> MKs show no defect in pro-PLT production

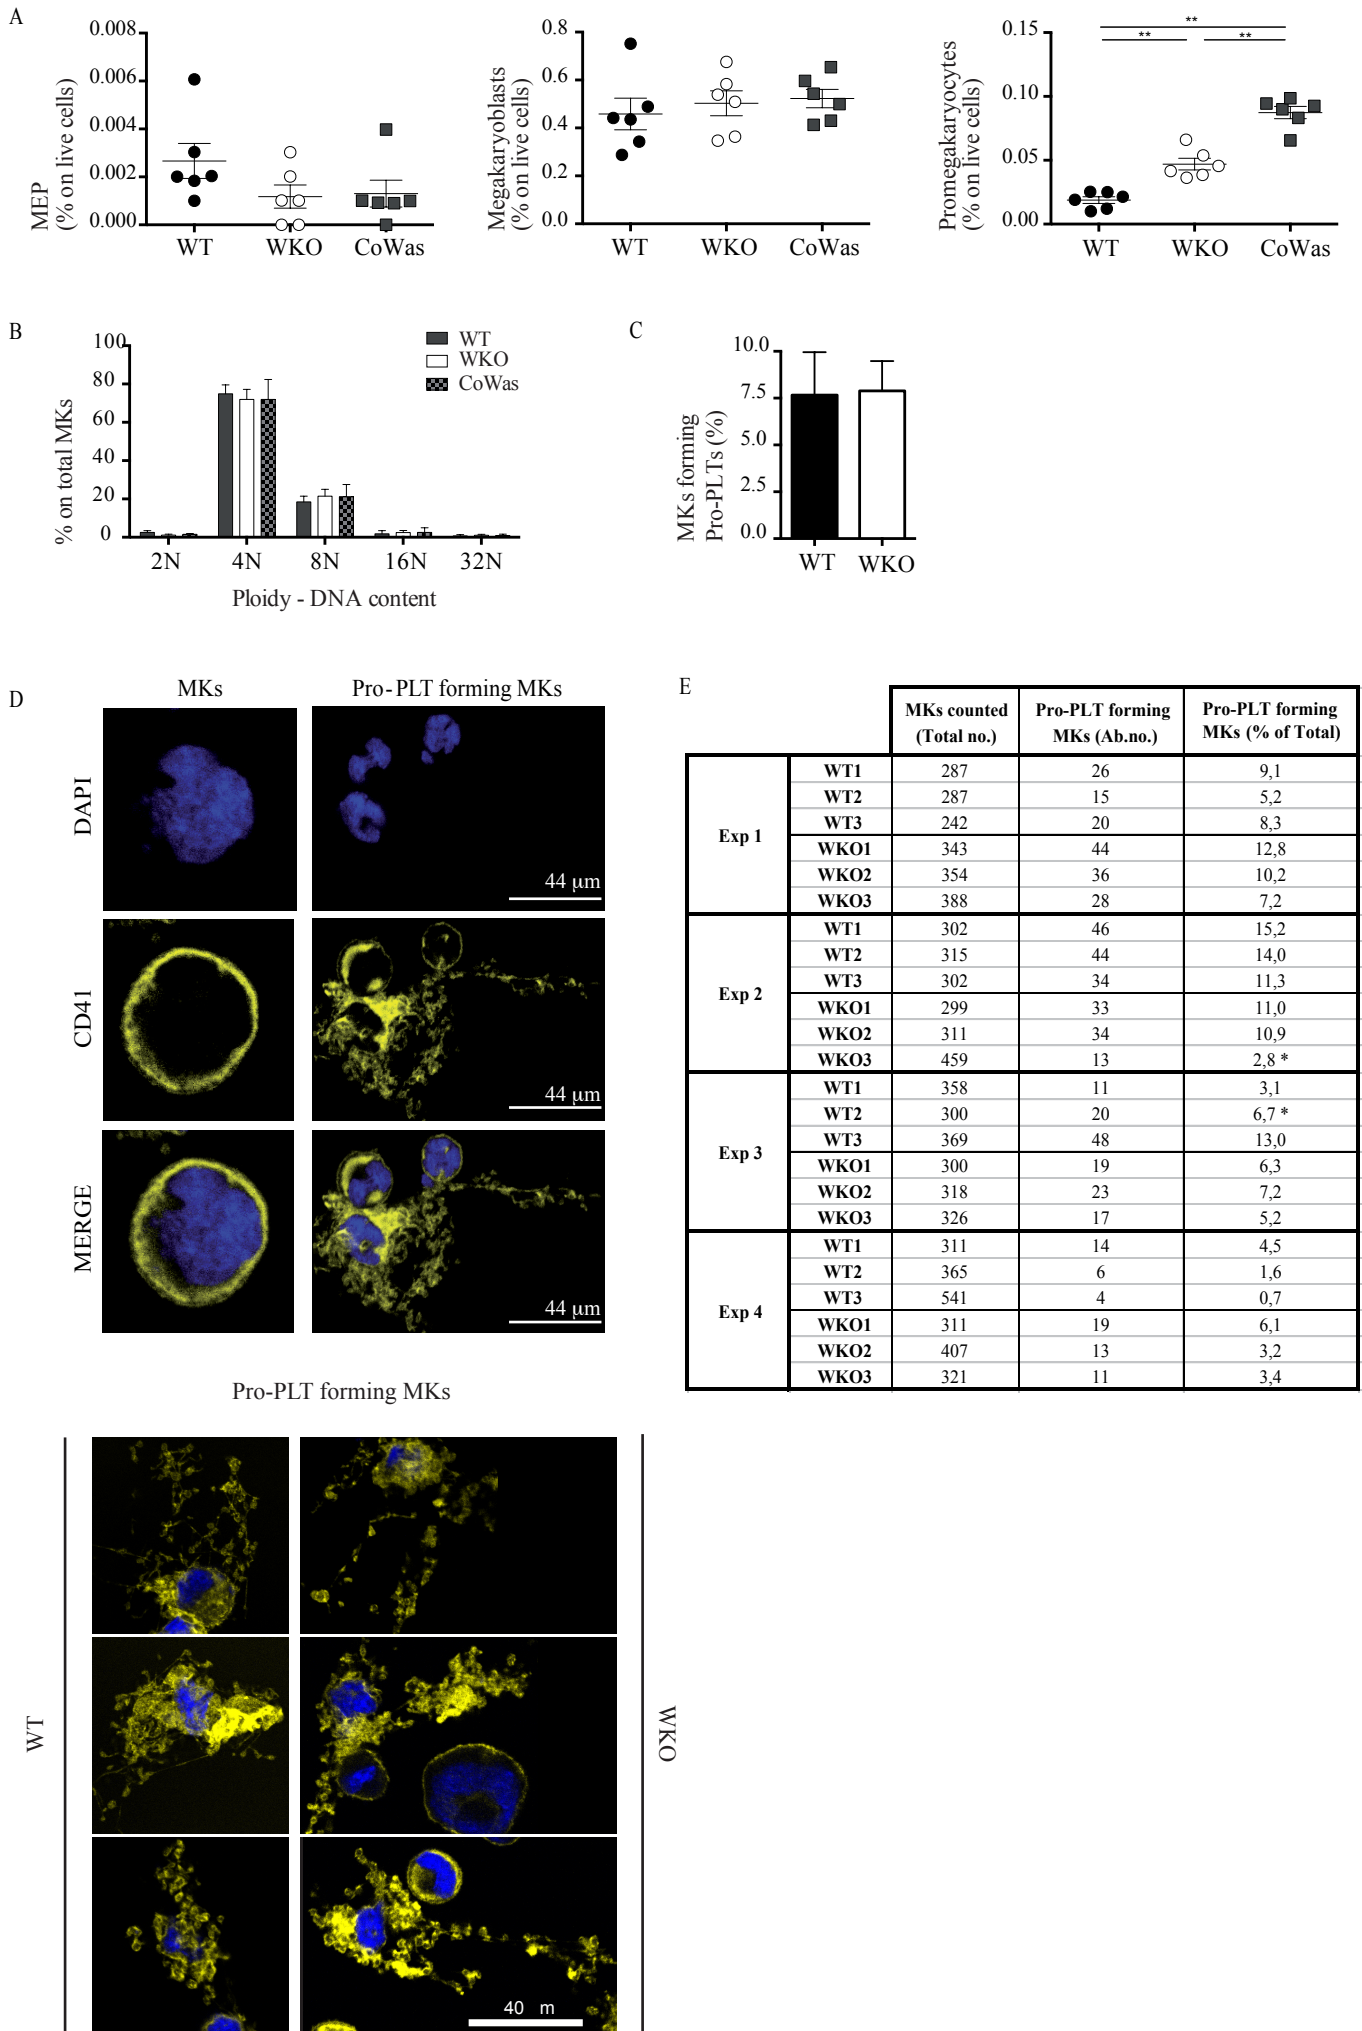

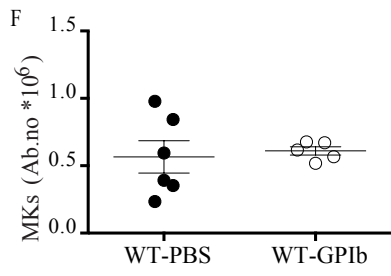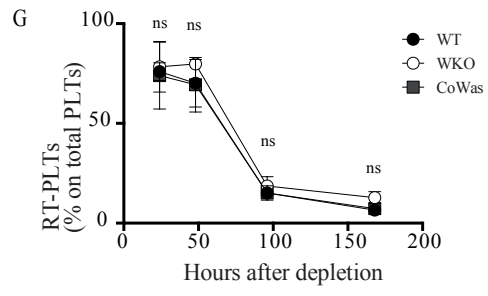

Supplement: NIHMS982539-supplement-Fig_E2.pdf [file NIHMS982539-supplement-Fig_E2.pdf]

Supplemental Fig 3: PLTs from mutant mice show a different proteomic profile

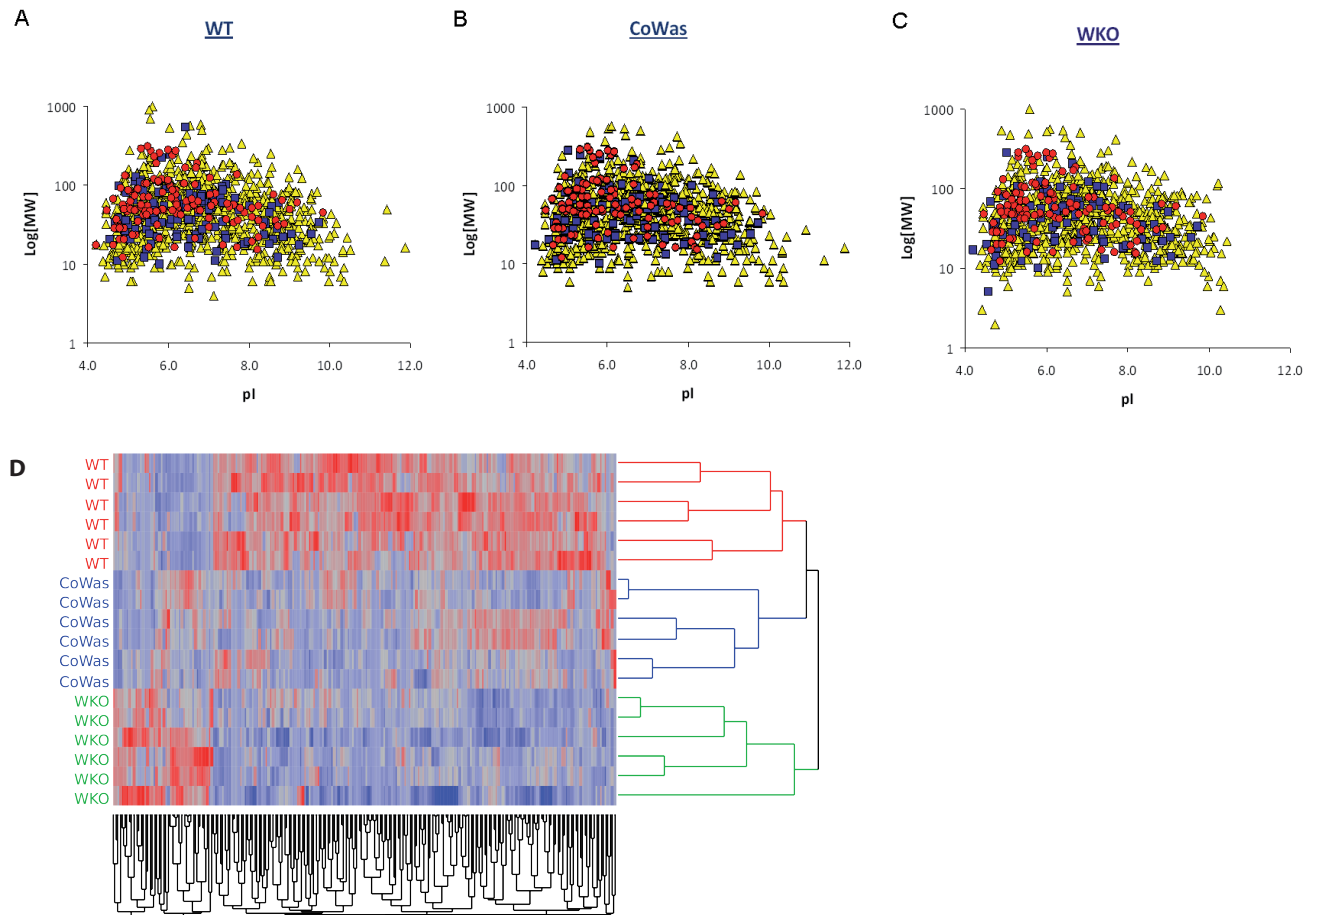

Supplement: NIHMS982539-supplement-Fig_E3.pdf [file NIHMS982539-supplement-Fig_E3.pdf]

Supplemental Fig 4: Total pathways identified by proteomic analysis

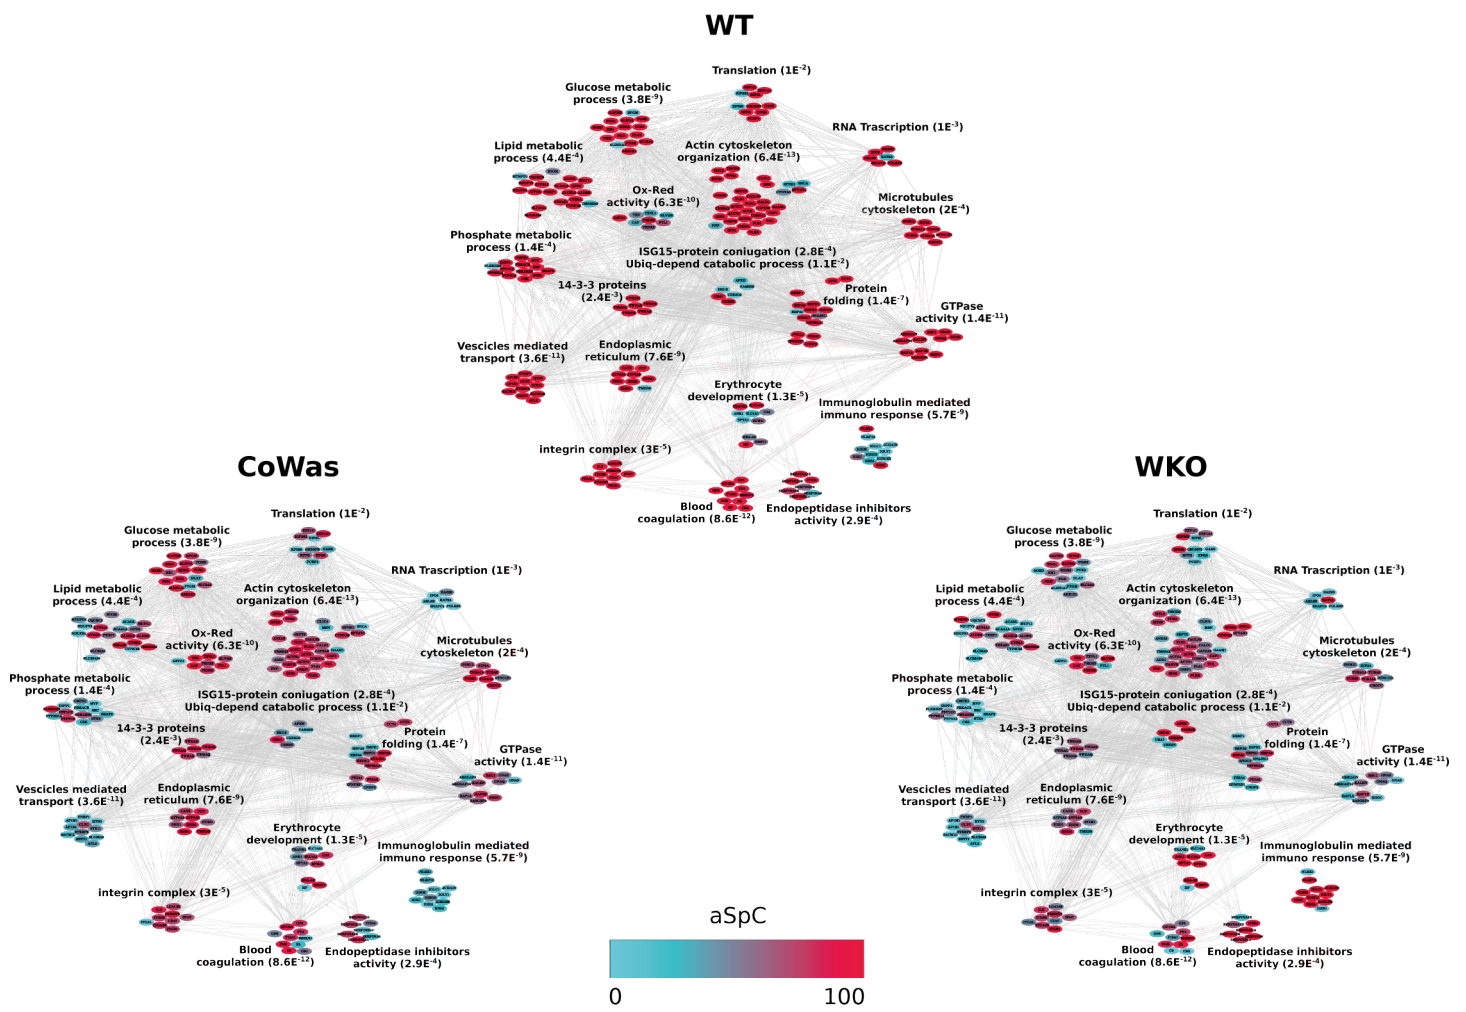

Supplement: NIHMS982539-supplement-Fig_E4.pdf [file NIHMS982539-supplement-Fig_E4.pdf]
